# Supplementary material for: High CD169 Monocyte/Lymphocyte Ratio Reflects Immunophenotype Disruption and Oxygen Need in COVID-19 Patients
Source: Pathogens. 2021 Dec 18;10(12):1639. doi: 10.3390/pathogens10121639 (PMC8715749; doi:10.3390/pathogens10121639)
Supplement: Supplementary file 1 [file pathogens-10-01639-s001.zip › Table S2.xlsx]

## Sheet: CORRELATION UNTREATED T
Pearson	RMFICD169MONOLYMPHO	CD169MEDMONO	LYMPHO % Parent	MONO % Parent	NEUTRO % Parent	CD3+ % Parent	CD4+ % Parent	CD8+ % Parent	CD8+CD4+ % Parent	CD8-CD4- % Parent	CD4+CD28-CD27+ % Parent	CD4+CD28+CD27+ % Parent	CD4+CD28-CD27- % Parent	CD4+CD28+CD27- % Parent	CD4CMper	CD4NAIVEper	CD4EMper	CD4TEMper	CD4CD57per	CD4PD1per	CD4+PD1-CD57+ % Parent	CD4PD1CD57per	CD4+PD1-CD57- % Parent	CD4+PD1+CD57- % Parent	CD8+CD27+CD28- % Parent	CD8+CD27+CD28+ % Parent	CD8+CD27-CD28- % Parent	CD8+CD27-CD28+ % Parent	CD8CMPer	CD8NAIVEPar	CD8EM	CD8TEMPer	CD8CD57Per	CD8PD1per	CD8+PD1-CD57+ % Parent	CD8PD1CD57per	CD8+PD1-CD57-perc	CD8+PD1+CD57-perc
RMFICD169MONOLYMPHO	1	,801**	0.00280509	-0.323474	,446*	-,540**	0.341833	-0.0456908	0.303674	-,407*	,640**	0.0987514	-,525**	-0.140985	-0.307879	0.0634476	,377*	-0.0433245	-0.0307924	-,373*	0.111156	0.129791	0.145906	-0.231248	,486**	0.180709	-,508**	0.108622	-,291*	-,330*	,241*	0,266*	0.238394	0.1157	0,516*	-0.010442	-0.0767011	-0.325374
		6.32237e-08	0.988478	0.086952	0.0153692	0.00248153	0.0695283	0.813936	0.10927	0.0285186	0.000184936	0.610297	0.00346055	0.465705	0.104207	0.743686	0.0436817	0.823417	0.874011	0.0462308	0.565935	0.50219	0.450116	0.227443	0.0075185	0.348194	0.00485953	0.574878	0.0359451	0.0248288	0.053093	0.0323915	0.212995	0.364722	0.0350973	0.957127	0.692502	0.085008
CD169MEDMONO	,801**	1	0.117793	-0.269858	0.266721	-,481**	0.293691	-0.106848	0.183642	-0.289776	,468*	0.0911572	-,424*	-0.0107187	-0.152497	-0.153729	0.197	0.00547531	-0.0294207	-0.277	0.0823377	0.00279814	0.216578	-0.276189	0.136	0.072236	123	0.11109	-0.192111	-0.256	0.051	0.107106	0.2871	0.0579858	0.259436	0.033038	-0.159972	-0.259434
	6.32237e-08		0.542818	0.156856	0.16192	0.00826478	0.122024	0.581175	0.340293	0.127314	0.0103878	0.638152	0.0220239	0.955992	0.429684	0.425921	0.330444	0.977512	0.879582	0.437695	0.671113	0.988506	0.259124	0.14698	0.0711281	0.709611	0.7	0.566169	0.318093	0.79369	0.291591	0.580259	0.131025	0.765109	0.174129	0.864904	0.407138	0.174133

## Sheet: correlation untreated B
	RMFICD169MONOLYMPHO	CD169MEDMONO	Marginal	NaiveB	IgD-CD27- % Parent	IgD-CD27+ % Parent	CD21lowCD38low	IgM+IgD+	IgM-IgD+	IgD-IgM-	IgM+IgD-	IgM+Cd27+CD38	unswitchedmemory	IgM+CD27-CD38dim	IgM+CD27-CD38high	IgD-IgM-CD27+CD38high	switchedmemory	IgM-IgD-CD27-CD38low	IgM-IgD-CD27-CD38high	plasmablasts	IgM+CD27-
RMFICD169MONOLYMPHO	1	0.0395313	,737*	,352*	-0.206044	-0.136504	-0.214687	,350*	0.0427382	-,421**	0.122825	,507**	-0.506	-,354*	0.0220213	0.217416	*-0,452	-,319*	-0.240677	*-0,307233270443127	-0.262339	0.0393004
		0.794218	3.76308e-06	0.042451	0.169507	0.365688	0.151923	0.0171936	0.777931	0.00359271	0.416102	0.000322659	0.330639	0.0158369	0.884503	0.14666	0.0479241	0.0304935	0.107134	0.0353807	0.078188	0.795394
CD169MEDMONO	0.0395313	1	0.0444047	-0.146716	0.117237	-0.247718	0.197902	0.266728	-0.293	-0.274252	0.331	0.0896112	0.109292	0.164584	-0.201328	-0.189213	-0.304	0.136981	-0.0163023	-0.162296	0.0477938	0.151587
	0.794218		0.769504	0.330568	0.437785	0.0969448	0.187376	0.0731534	0.480401	0.065122	0.447343	0.55369	0.469666	0.274387	0.1797	0.207887	0.397468	0.364	0.914367	0.281205	0.752448	0.314585
												,

## Sheet: CORRELATION biochem citokines
pearson markers		CD169MEDMONO	RMFICD169MONOLYMPHO			untreated group		CD169MEDMONO	RMFICD169MONOLYMPHO
CD169MEDMONO	Coefficiente di correlazione	1	,783**			IL6	Coefficiente di correlazione	0.236	,0.415**
	Sign. (a due code)		2.52032e-26				Sign. (a due code)	0.32	0.015
CD64MEDLYMPH	Coefficiente di correlazione	-,352**	-,181*			IL10	Coefficiente di correlazione	-0.352	0.488*
	Sign. (a due code)	7.5203e-05	0.0475156				Sign. (a due code)	0.75203	0.00
CD64MEDMONO	Coefficiente di correlazione	,448**	0.096692			TNFalpha	Coefficiente di correlazione	0.148	0.102
	Sign. (a due code)	2.5962e-07	0.291404				Sign. (a due code)	0.63	0.291404
							N
RMFICD169MONOLYMPHO	Coefficiente di correlazione	,783**	1			IFN gamma	Coefficiente di correlazione	0.183	0.123
	Sign. (a due code)	2.52032e-26					Sign. (a due code)	0.32	0.55
RMFICD64NEUTROLYMPHO	Coefficiente di correlazione	-0.000172743	0.0870589
	Sign. (a due code)	0.9985	0.342361
HLADRMONO	Coefficiente di correlazione	0.0277099	0.0554504
	Sign. (a due code)	0.762878	0.545785
Ptper	Coefficiente di correlazione	0.198676	0.215135
	Sign. (a due code)	0.13846	0.108026
PTINR	Coefficiente di correlazione	-0.0977334	-0.0587635
	Sign. (a due code)	0.469521	0.664142
PTSec	Coefficiente di correlazione	-0.156122	-0.150179
	Sign. (a due code)	0.246166	0.264831
APTTRATIO	Coefficiente di correlazione	0.0623135	0.0923836
	Sign. (a due code)	0.64517	0.494296
APTTSec	Coefficiente di correlazione	0.0371805	-0.0106971
	Sign. (a due code)	0.783637	0.937053
Fibrinogen	Coefficiente di correlazione	0.162947	0,566*
	Sign. (a due code)	0.225864	0.03
AntitrombinaIII	Coefficiente di correlazione	0.115916	0.241974
	Sign. (a due code)	0.403893	0.0779292
DDIMERO	Coefficiente di correlazione	-0.215099	-0.122993
	Sign. (a due code)	0.108085	0.362048
GLICEMIA	Coefficiente di correlazione	-0.0233338	0.00611397
	Sign. (a due code)	0.854785	0.961758
AZOTEMIA	Coefficiente di correlazione	-0.215202	-0.119658
	Sign. (a due code)	0.0876818	0.346301
ALBUMIN	Coefficiente di correlazione	0.125946	,362*
	Sign. (a due code)	0.507222	0.0491516
AST	Coefficiente di correlazione	0.214	,383**
	Sign. (a due code)	0.116442	0.00179363
ALT	Coefficiente di correlazione	0.174317	0.214312
	Sign. (a due code)	0.168318	0.0890323
LDH	Coefficiente di correlazione	0.0255698	0.197499
	Sign. (a due code)	0.844918	0.127091
PCR	Coefficiente di correlazione	0.108914	0.149766
	Sign. (a due code)	0.403417	0.249312
AMILASE	Coefficiente di correlazione	-0.0347504	0.0843107
	Sign. (a due code)	0.790336	0.518268
	N	61	61
LIPASE	Coefficiente di correlazione	0.0767339	,266*
	Sign. (a due code)	0.560072	0.0400175
IgG	Coefficiente di correlazione	-,504**	-,443*
	Sign. (a due code)	0.00454593	0.0141983
