# Supplementary figures and images for: High CD169 Monocyte/Lymphocyte Ratio Reflects Immunophenotype Disruption and Oxygen Need in COVID-19 Patients
Source: MDPI journal article supplement (doi:10.3390/pathogens10121639), 2021-12-18

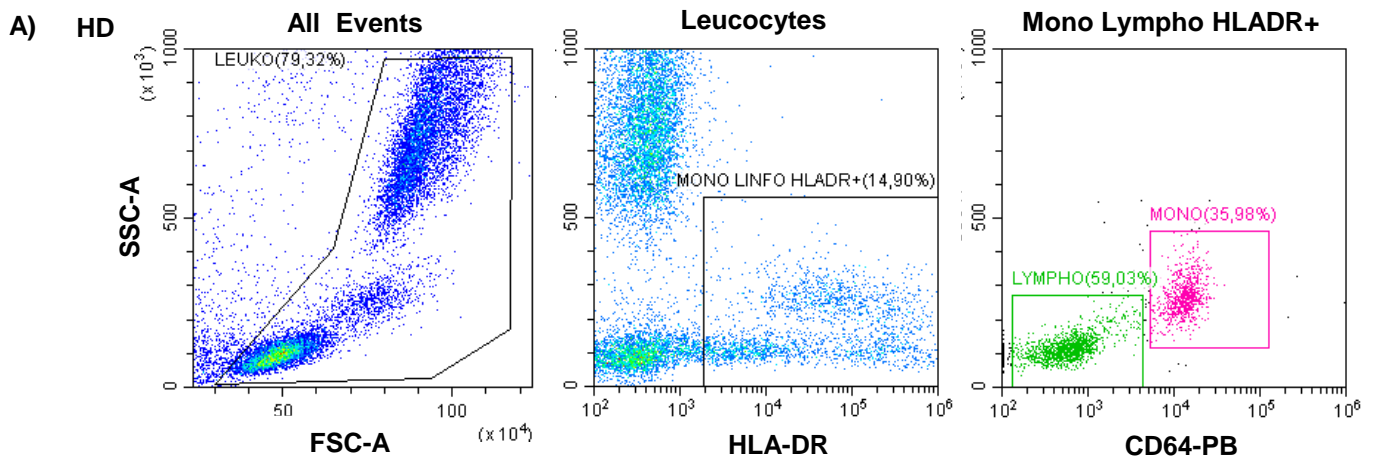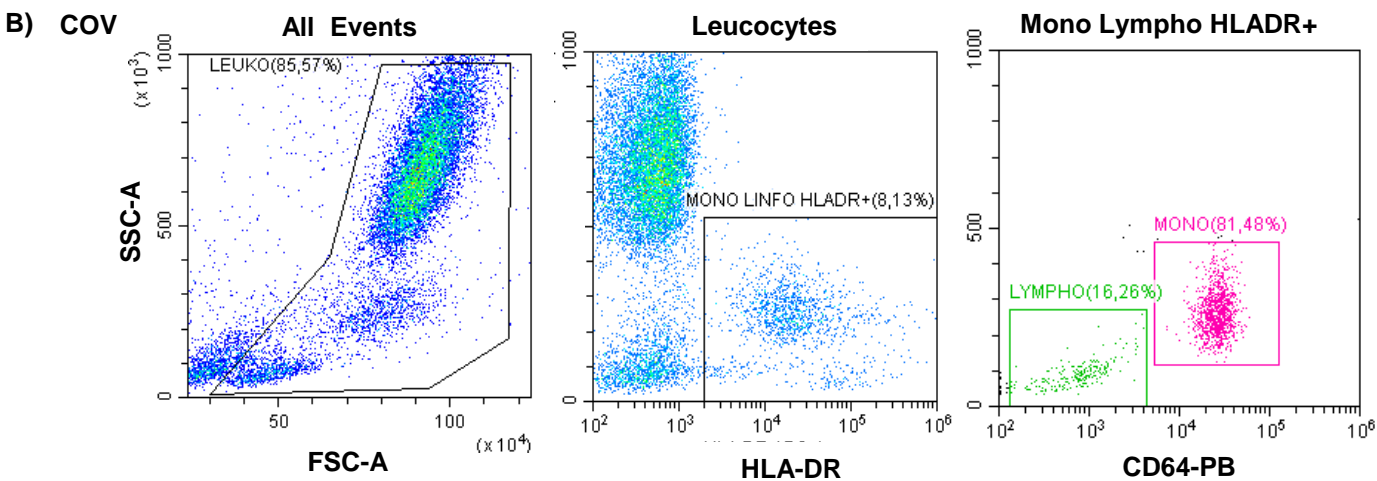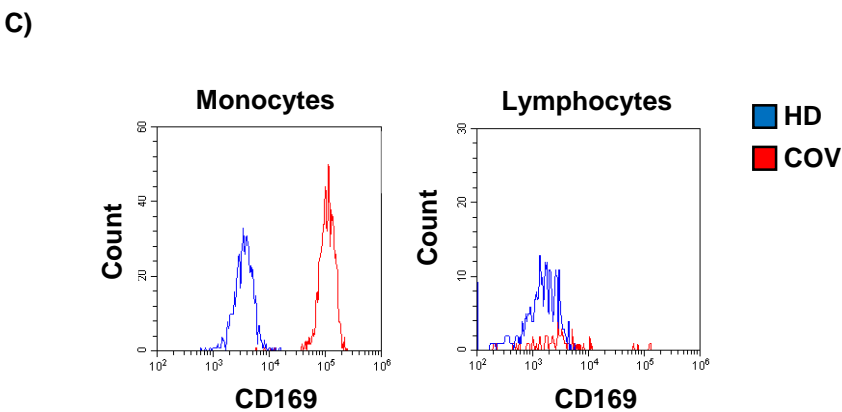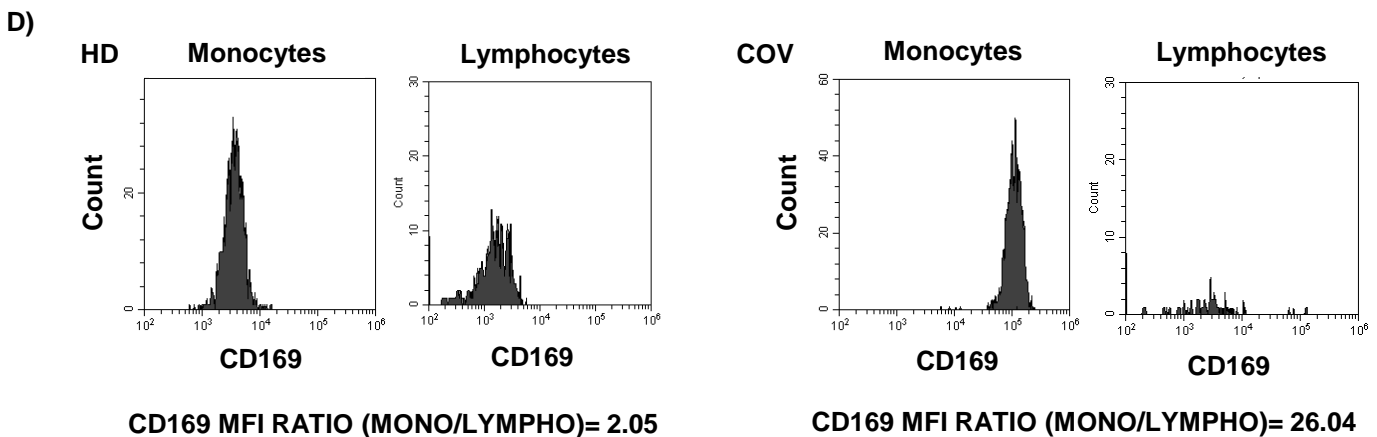

Supplement: s1 [file s1]

A)

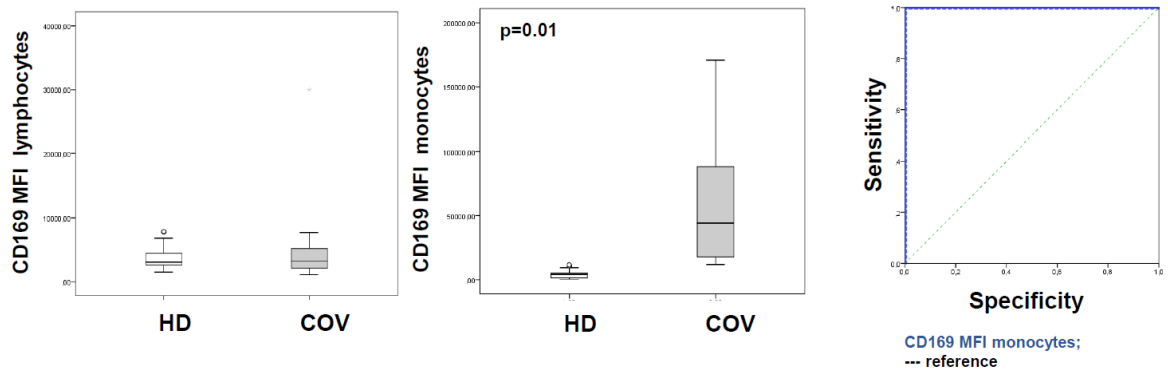

B)

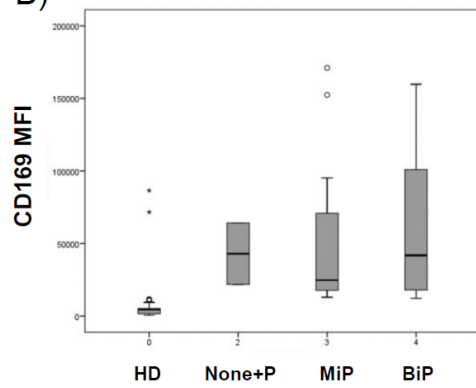

C)

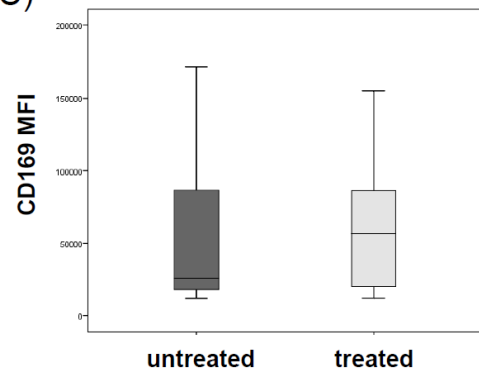

Supplement: s1 [file s1]
